# Supplementary material
Source: PubMed Central journal article supplement (PMC4447824)
Supplement: supp_ddu741_ddu741supp.pdf [file supp_ddu741_ddu741supp.pdf]

**Wiesner, Sinniger and collaborators**

**Supplemental material**

**Fig. S1:** EMG analysis in wild type and G59S-mice at the age of 200, 250, 300 and 400 days. Dynactin (G59S) mutant mice show evidences of denervation, demonstrated in EMG abnormalities at the age of 300 days to end stage.

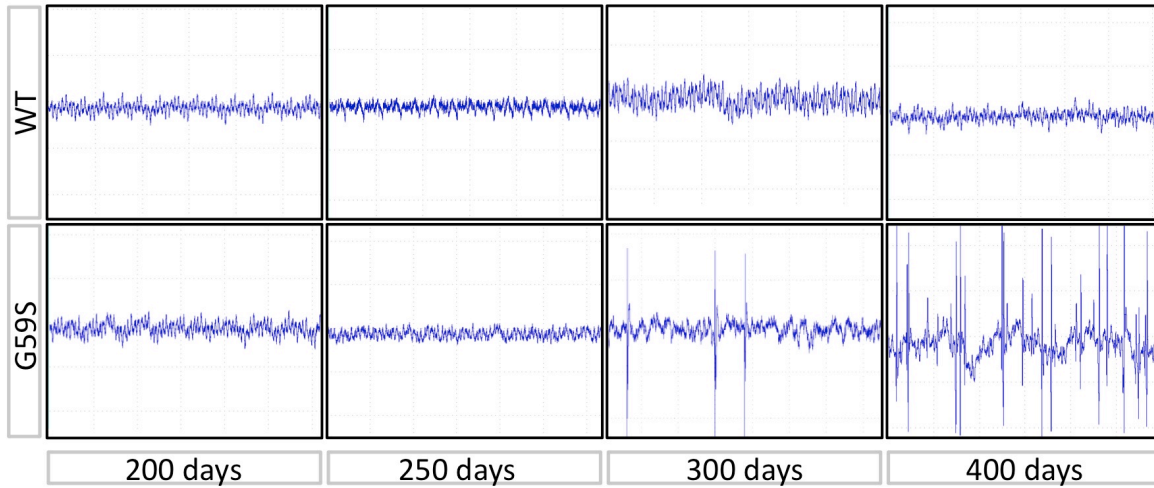

**Table S1: compositions of diets used in this study**

|                          | <b>CHOW</b> | <b>LPD</b> |
|--------------------------|-------------|------------|
| protein (%)              | 20.8        | 5.1        |
| fat (%)                  | 4.2         | 10.0       |
| fibres (%)               | 5.0         | 4.3        |
| starch (%)               | 46.8        | 39.2       |
| sugar (%)                | 10.8        | 13.0       |
|                          |             |            |
| Nutrient content (MJ/kg) | 18.0        | 18.3       |

**Table S2: primer sequences for qPCR**

| <b>Primer</b> | <b>Forward 5' - 3'</b> | <b>Reverse 5' - 3'</b> |
|---------------|------------------------|------------------------|
| LC3           | CATGAGCGAGTTGGTCCAGA   | TGACTCAGAAGCCGAAGGTT   |
| p62           | GAAGCTGCCCTATACCCACA   | TGGGAGAGGGACTCAATCAG   |
| FoxO3         | GCTAAGCAGGCCTCATCTCA   | TTCCGTCAGTTTGAGGGTCT   |
| Beclin1       | GCCTCTGAAACTGGACACGA   | TAGCCTCTTCCTCCTGGGTC   |
| Lamp 1        | GCCCTGGAATTGCAGTTTGG   | TGCTGAATGTGGGCACTAGG   |
| Cathepsin B   | AGGCTGGACGCAACTTCTAC   | CCAAATGCCCAACAAGAGCC   |
| Cathepsin D   | CAACGTGCTTCCGGTCTTTG   | CTCATTGCCACCTCCAAC     |
| ATP6v1h       | TTAGCTGTTGCTGCTCACGA   | CCAACTGCTTCCACCAAGC    |
| D1A           | GAACCCAGAAGACAGGTGGA   | GCTTAGCCCTCACGTTCTTG   |
| Lamp2-A       | GCAGTGCAGATGAAGACAAC   | AGTATGATGGCGCTTGAGAC   |
| Snat 2        | TGAAAAGCCATTATGCCGACG  | CCCACAATCGCATTGCTCAG   |
| Actin         | CCACCAGTTCGCCATGGAT    | GGCTTTGCACATGCCGGAG    |
| Pol2          | GCTGGGAGACATAGCACCA    | TTACTCCCCTGCATGGTCTC   |
| HPRT          | GGAGCGGTAGCACCTCCT     | CTGGTTCATCATCGCTAATCAC |
